# Supplementary material
Source: PubMed Central journal article supplement (PMC9011175)
Supplement: jamaoncol-e220238-s002.pdf [file jamaoncol-e220238-s002.pdf]

## Data Sharing Statement

Procopio. Cabozantinib as First-Line Treatment in Patients With Metastatic Collecting Ducts Renal Cell Carcinoma. *JAMA Oncol.* Published April 14, 2022.  
doi:10.1001/jamaoncol.2022.0238

### Data

**Data available:** No
